# Supplementary material for: Cell Wall Glycans Mediate Recognition of the Dairy Bacterium Streptococcus thermophilus by Bacteriophages
Source: PubMed Central journal article supplement (PMC6238053; doi:10.1128/aem.01847-18), 2018-11-15
Supplement: zam023188871s1.pdf [file zam023188871s1.pdf]

1 **Supplemental material**

2 TABLE S1 Results of a volumetric viscosity test performed for stain STCH\_09 and its phage  
3 resistant mutants (BIMs) to assess the difference in the exocellular polysaccharides (free EPS)  
4 production.

| Strain        | Viscosity time 1<br>[s] | Viscosity time 2<br>[s] | Viscosity time 3<br>[s] | Viscosity time<br>average [s] | St.<br>dev. | Viscosity |
|---------------|-------------------------|-------------------------|-------------------------|-------------------------------|-------------|-----------|
| STCH_09       | 42                      | 43                      | 42                      | 42                            | 1           | normal    |
| STCH_09_BIM   | 46                      | 46                      | 46                      | 46                            | 0           | enhanced  |
| STCH_09_BIM_1 | 53                      | 50                      | 50                      | 51                            | 2           | enhanced  |
| STCH_09_BIM_2 | 39                      | 37                      | 39                      | 38                            | 1           | normal    |
| STCH_09_BIM_3 | 48                      | 48                      | 43                      | 46                            | 3           | enhanced  |
| STCH_09_BIM_4 | 42                      | 42                      | 37                      | 40                            | 3           | normal    |
| STCH_09_BIM_5 | 33                      | 33                      | 32                      | 33                            | 1           | reduced   |
| STCH_09_BIM_6 | 44                      | 42                      | 38                      | 41                            | 3           | normal    |

5

6 TABLE S2 List of mutations detected in phage resistant mutants (BIMs) generated in this study  
 7 and confirmed by Sanger sequencing.

| <b>BIM</b>    | <b>Mutated gene</b>                                                  | <b>Type of mutation<sup>a</sup></b> |
|---------------|----------------------------------------------------------------------|-------------------------------------|
| STCH_09_BIM   | Glycosyltransferase <i>epsH</i>                                      | AA substitution                     |
|               | Glycosyltransferase <i>rgp</i>                                       | Gene truncation                     |
| STCH_13_BIM   | Tyrosine-kinase <i>epsD</i>                                          | AA insertion                        |
|               | Type I R-M system, DNA-methyltransferase subunit M                   | AA substitution                     |
| STCH_14_BIM   | Glycosyltransferase <i>epsE</i>                                      | Gene truncation                     |
|               | O-antigen export system permease protein                             | AA substitution                     |
|               | Two-component sensor kinase                                          | AA substitution                     |
| STCH_15_BIM_1 | Glycosyltransferase <i>epsE</i>                                      | Gene deletion                       |
|               | 5'-nucleotidase family protein in cluster with NagD-like phosphatase | Gene truncation                     |
|               | Zinc protease                                                        | AA substitution                     |
| STCH_15_BIM_2 | Ribose-phosphate pyrophosphokinase                                   | AA substitution                     |
|               | Glycosyltransferase <i>epsK</i>                                      | AA substitution                     |
| STCH_15_BIM_3 | Guanylate kinase                                                     | AA substitution                     |
|               | Glycosyltransferase <i>epsK</i>                                      | Gene truncation                     |
| STCH_15_BIM_4 | Glycosyltransferase <i>epsK</i>                                      | Gene truncation                     |
| STCH_15_BIM_5 | Glycosyltransferase <i>epsK</i>                                      | Gene truncation                     |
|               | Guanylate kinase                                                     | AA substitution                     |

8 <sup>a</sup>AA stands for amino acid

9

10 TABLE S3 List of samples collected during purification of cellular fractions with their relevant  
 11 characteristics.

| <b>Purification step no.</b> | <b>Sample name</b>                                              | <b>Cell wall components present in the sample<sup>a</sup></b>                                |
|------------------------------|-----------------------------------------------------------------|----------------------------------------------------------------------------------------------|
| 1                            | Cells in exponential phase                                      | surface enzymes, membrane, membrane proteins, cell wall proteins, EPS/CPS, LTA, WTA, WPS, PG |
| 2                            | Cells devoid of surface enzymes, membrane and membrane proteins | cell wall proteins, CPS, LTA, WTA, WPS, PG                                                   |
| 3                            | Purified cell walls                                             | CPS, WTA, WPS, PG                                                                            |
| 4                            | Purified peptidoglycan                                          | PG                                                                                           |

12 <sup>a</sup>Cell wall components: exocellular polysaccharides (EPS/CPS), lipoteichoic acids (LTA), wall teichoic acids  
 13 (WTA), polysaccharides intercalated with cell walls (WPS), peptidoglycan (PG)

14

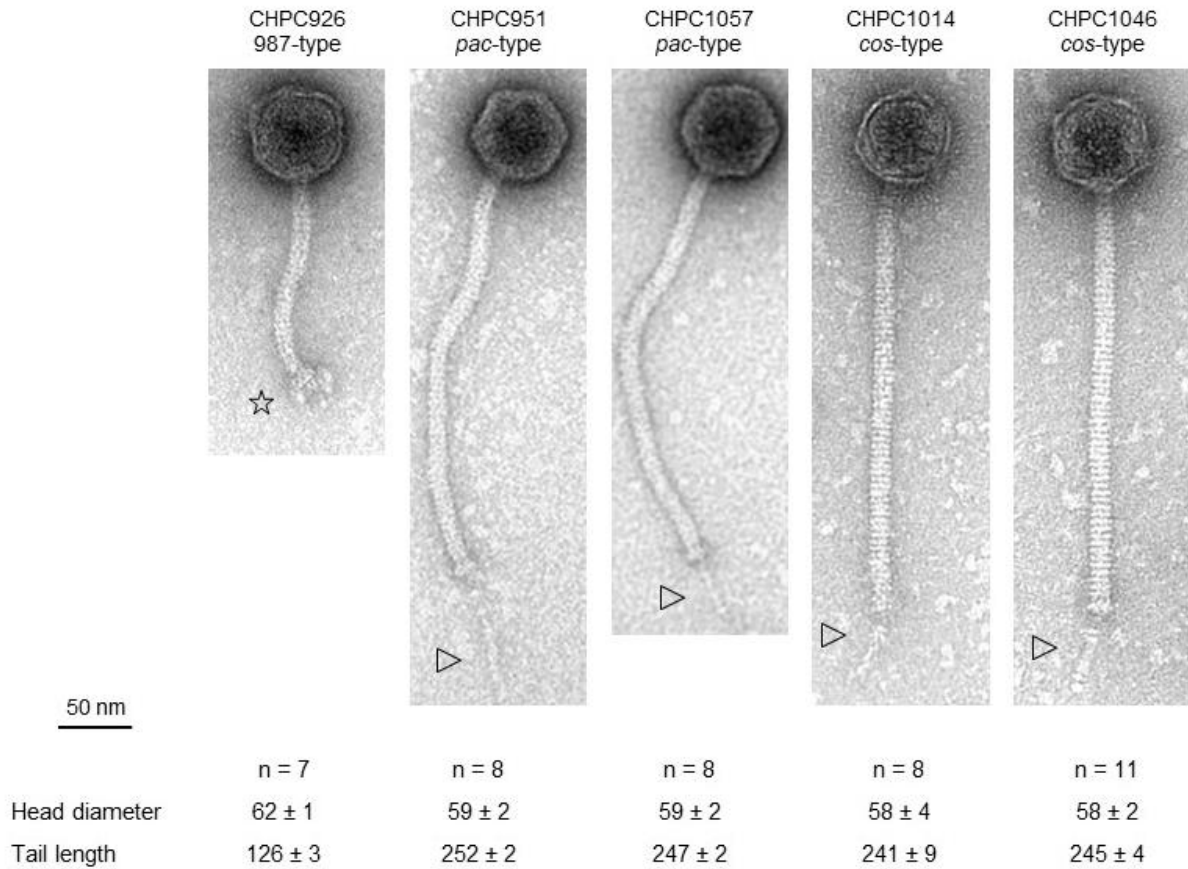

16

17 **FIG S1 Transmission electron micrograph images of *S. thermophilus* phages used in this**  
 18 **study.** The symbols indicate baseplate structures (asterisk) and a single central tail fiber (triangle).  
 19 Head and tail sizes are indicated in nm. Images of CHPC926, CHPC1014, CHPC1046 were  
 20 published previously (Szymczak *et al.* 2017).

21

**a**

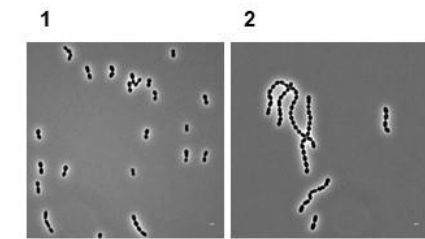

| # cells in chains |       |       |
|-------------------|-------|-------|
| Average           | 3 ± 1 | 9 ± 6 |
| Min               | 1     | 2     |
| Max               | 8     | 29    |

**b**

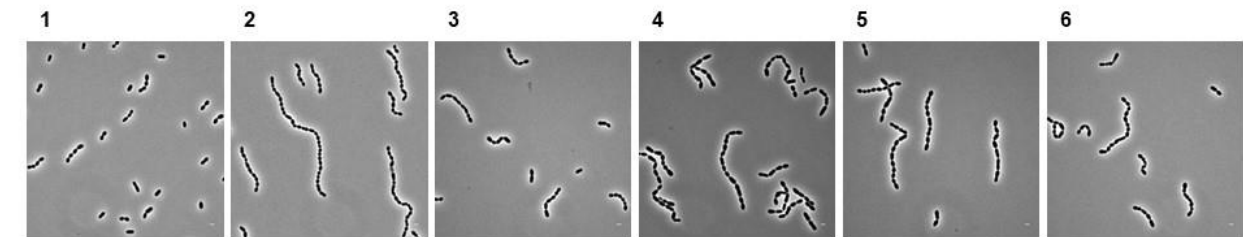

| # cells in chains |       |        |       |       |       |       |
|-------------------|-------|--------|-------|-------|-------|-------|
| Average           | 2 ± 1 | 13 ± 8 | 5 ± 3 | 7 ± 4 | 9 ± 5 | 9 ± 5 |
| Min               | 1     | 2      | 2     | 2     | 2     | 2     |
| Max               | 8     | 45     | 20    | 24    | 26    | 22    |

22

23 **FIG S2 Changes in chain lengths of *S. thermophilus* wild type strains and their phage-**

24 **resistant mutants.** (a) STCH\_14 forms short chains (1) and its phage-resistant mutant

25 STCH\_14\_BIM forms elongated chains (2). (b) STCH\_15 forms short chains (1) and its phage-

26 resistant mutants STCH\_15\_BIM\_1, STCH\_15\_BIM\_2, STCH\_15\_BIM\_3, STCH\_15\_BIM\_4,

27 STCH\_15\_BIM\_5 form elongated chains (panels no. 2-6, respectively). For each strain, cells in

28 100 chains were counted to calculate the average number of cells per chain. Scale bars: 1 μm.

29

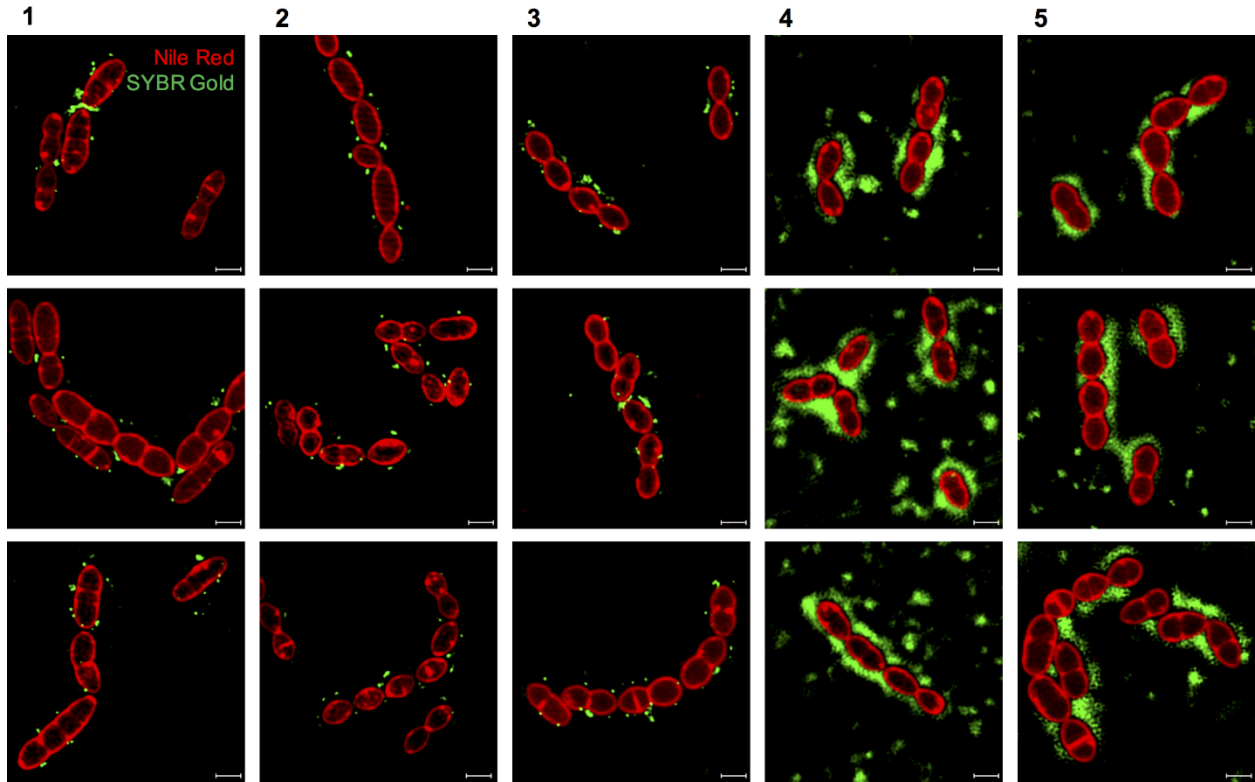

30

31 **FIG S3 Super-resolution structured illumination microscopy (SR-SIM) images of phage**  
 32 **binding to *S. thermophilus* strains.** Bacterial cells were stained with Nile Red (red) and mixed  
 33 with SYBR Gold DNA-labeled phages (green). Panels with phages and their host strains: (1)  
 34 CHPC926 and STCH\_15, (2) CHPC951 and STCH\_12, (3) CHPC1057 and STCH\_09, (4)  
 35 CHPC1014 and STCH\_13, (5) CHPC1046 and STCH\_14. Two binding patterns are observed:  
 36 spotty (panels no. 1, 2, 3) or diffused (panels no. 4, 5). Scale bars: 1  $\mu\text{m}$ .

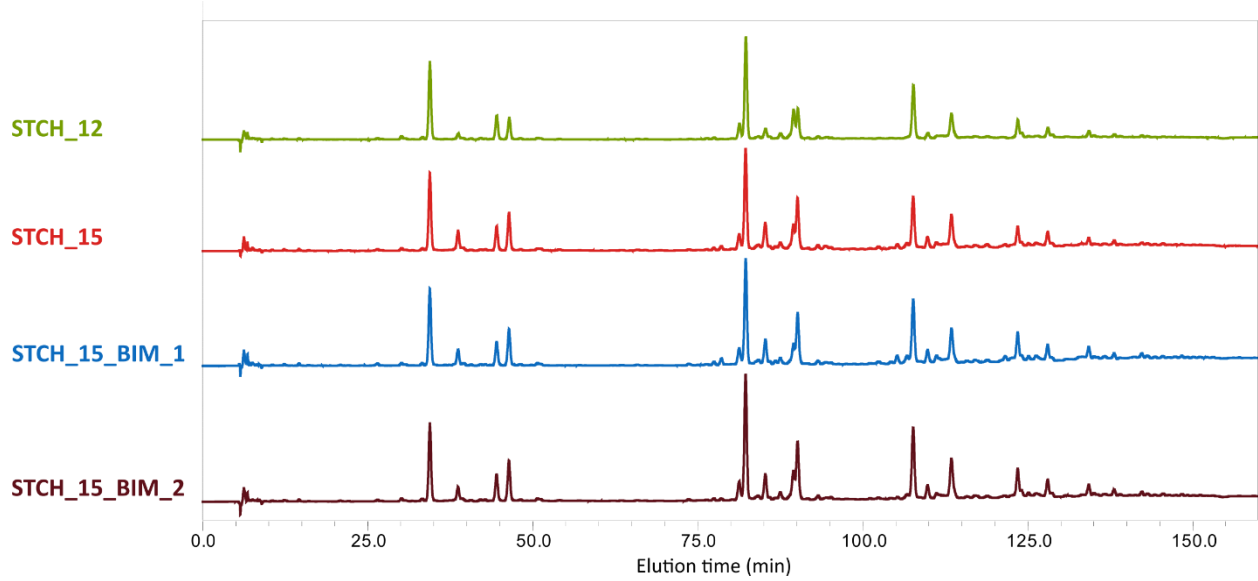

37

38 **FIG S4 HPLC profiles of muropeptides in peptidoglycan isolated from *S. thermophilus***

39 **strains.** Analysis was performed for two wild type strains (STCH\_12 and STCH\_15) and two

40 phage-resistant mutants (STCH\_15\_BIM\_1 and STCH\_15\_BIM\_2).

41

**a**

**Monosaccharide composition in peptidoglycan**

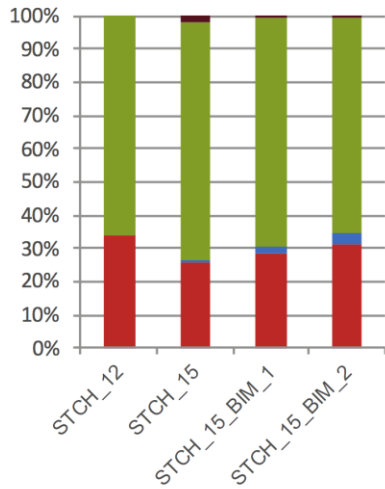

**b**

**Monosaccharide composition in cell walls**

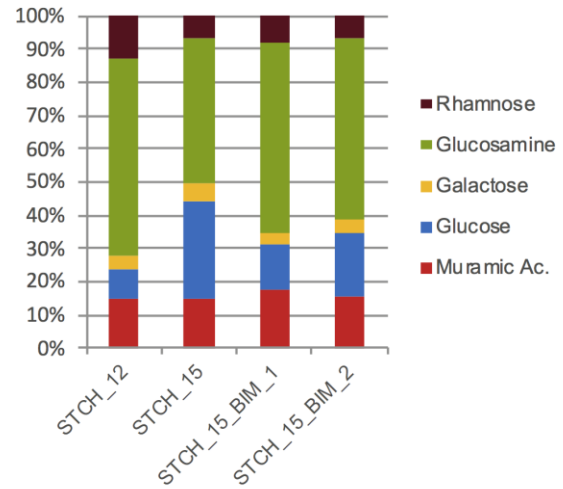

42

43 **FIG S5 Monosaccharide compositions in peptidoglycan and cell walls isolated from *S.***

44 ***thermophilus* strains.** Cellular fractions were purified from two wild type strains (STCH\_12 and

45 STCH\_15) and two phage-resistant mutants (STCH\_15\_BIM\_1 and STCH\_15\_BIM\_2). Values

46 were calculated based on individual peak areas compared to the total peak area from HPAEC-PAD

47 analyzes performed for: (a) purified peptidoglycan, (b) purified cell walls. Standards for different

48 saccharides were eluted under the same conditions to allow peak identification.

49



50 **References**

51 Szymczak P, Janzen T, Neves AR, Kot W, Hansen LH, Lametsch R, Neve H, Franz CMAP,  
52 Vogensen FK. 2017. Novel variants of *Streptococcus thermophilus* bacteriophages are indicative  
53 of genetic recombination among phages from different bacterial species. *Appl Environ Microbiol*  
54 83:1–16.
